# Supplementary material for: Uncovering the Interrelation between Metabolite Profiles and Bioactivity of In Vitro- and Wild-Grown Catmint (Nepeta nuda L.)
Source: MDPI journal article supplement (doi:10.3390/metabo13101099), 2023-10-20
Supplement: s1 [file s1]

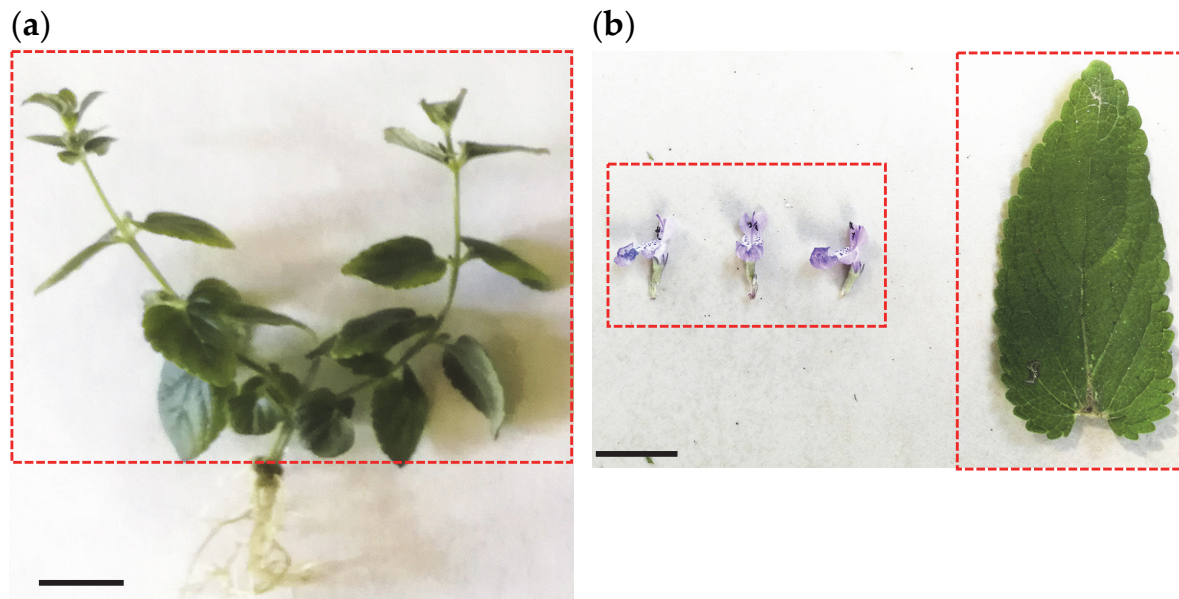

**Figure S1.** *Nepeta nuda* samples. Red punctuated rectangular indicates plant parts taken for analyses (a) Whole shoots of *in vitro* grown plants (5 weeks-old); (b) Individual flowers and leaves from *ex vitro* adapted *N. nuda* plants (at the phase of active blooming, at 24<sup>th</sup> of June). Scale bar: 1 cm.

(a)

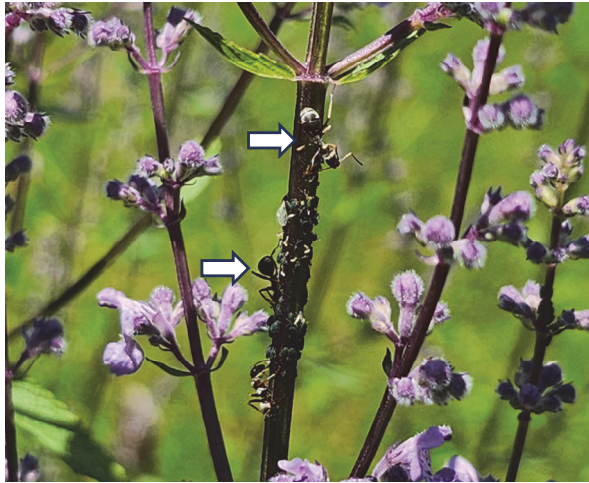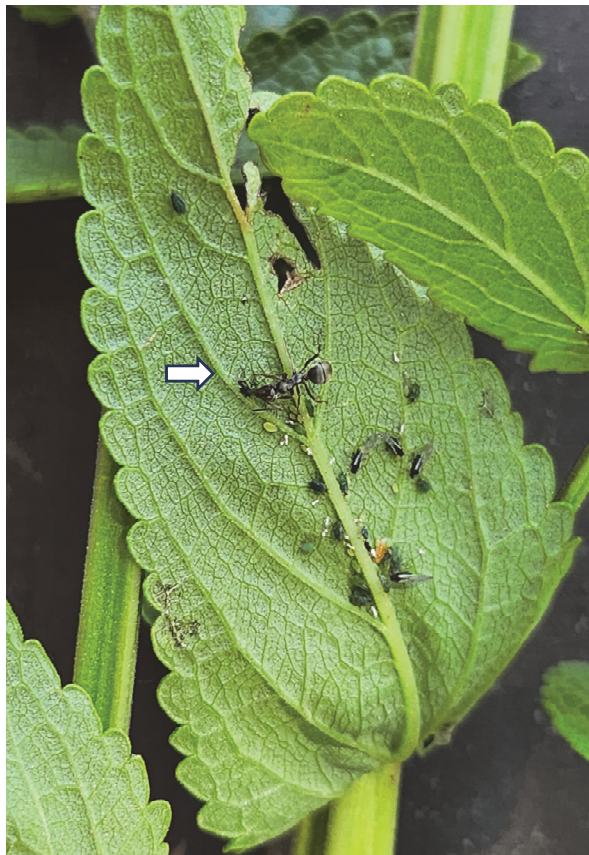

(b)

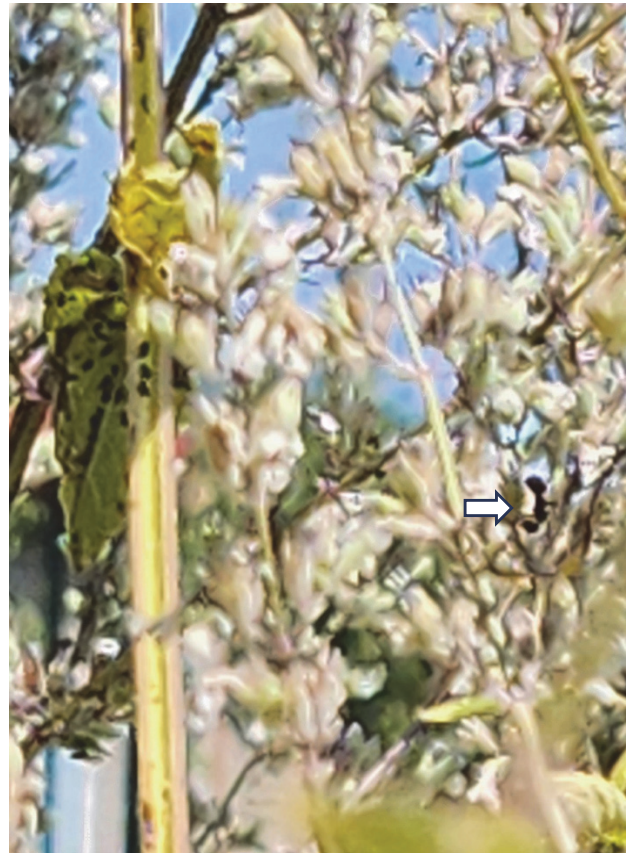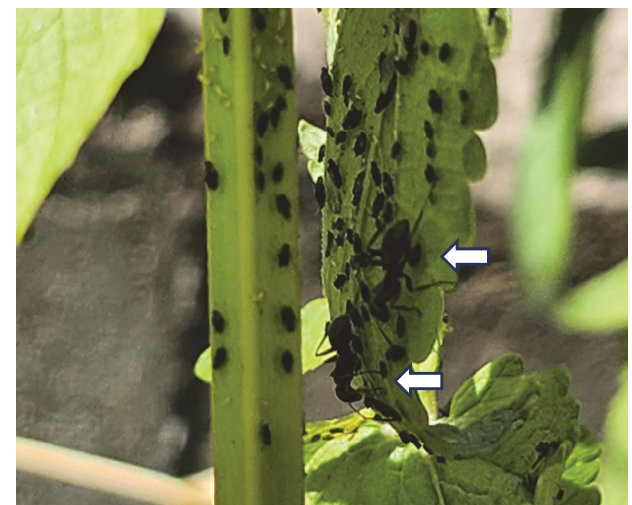

**Figure S2.** Ants and aphids on *N. nuda* flowers and leaves of wild-grown plants. (a) In beginning of July. (b) Three weeks later in July. Arrows point to ants.

**Table S1.** Pearson correlation coefficients of metabolites found in *N. nuda* polar/non-polar extracts versus biological activities: antioxidant (AO), antiviral (AV) against Human Herpes Virus 1 when simultaneously applied (AHHV1 SA) and 1-hour-post-treatment applied (AHHV1 PA), antibacterial (AB) against Gram(+) *Staphylococcus aureus* (ASa) or Gram(-) *Klebsiella pneumonia* (AKp), and anti-inflammatory;  $P < 0.05$ ,  $n=3$ .

| Metabolites        |                                          | <i>N. nuda</i> biological activities |                     |                     |       |       | References |
|--------------------|------------------------------------------|--------------------------------------|---------------------|---------------------|-------|-------|------------|
|                    |                                          | AO                                   | AHHV1 <sup>SA</sup> | AHHV1 <sup>PA</sup> | ASa   | AKp   | AI         |
| Total metabolites  |                                          |                                      |                     |                     |       |       |            |
|                    | Phenolics                                | 0.996                                |                     | 0.858               |       |       | [10]       |
|                    | Flavonoids                               |                                      | 0.814               |                     |       |       | [10]       |
|                    | Anthocyanins                             | 1.000                                |                     | 0.810               | 0.996 |       | AV[54]     |
|                    | Reducing sugars                          | 0.994                                |                     | 0.868               | 0.980 |       | AO[55]     |
| Polar fraction     |                                          |                                      |                     |                     |       |       |            |
| P2                 | Malonic acid                             |                                      |                     |                     |       | 0.906 | Kp[56]     |
| P6                 | Fumaric acid, 2-methyl- (Mesaconic acid) |                                      | 0.837               |                     |       |       | AV[57]     |
| P7                 | Citramalic acid                          |                                      | 0.930               |                     |       |       | AV, AI[57] |
| P8                 | Malic acid                               | 0.915                                |                     |                     | 0.949 | 0.960 | ASa[58]    |
| P9                 | Erythronic acid                          | 0.924                                |                     |                     | 0.956 | 0.953 |            |
| P10                | Tartaric acid                            |                                      |                     |                     |       | 0.865 | AKp[59]    |
| P14                | L-Valine                                 |                                      |                     |                     |       | 0.817 | AKp[60]    |
| P16                | Proline                                  |                                      |                     |                     | 0.818 | 1.000 | AKp[61]    |
| P17                | Glycine                                  |                                      |                     |                     |       | 0.905 | AKp[62]    |
| P18                | Serine                                   |                                      |                     |                     |       | 0.837 |            |
| P28                | Fructose                                 | 1.000                                |                     | 0.807               | 0.996 |       | AV[63]     |
| P29                | Glucose                                  | 0.997                                |                     |                     | 1.000 | 0.812 | AKp[61]    |
| P30                | Mannose                                  | 0.999                                |                     | 0.834               | 0.991 |       | AV[64]     |
| P31                | Galactose                                | 0.994                                |                     | 0.867               | 0.980 |       | AB, AV[65] |
| P32                | Myo-Inositol                             |                                      | 0.983               | 0.895               |       |       | AV[66]     |
| P33                | Sucrose                                  | 0.919                                | 0.879               | 0.976               | 0.878 |       | AO[67]     |
| P34                | Trehalose, alpha,alpha'-                 | 1.000                                |                     | 0.827               | 0.992 |       | AV[68]     |
| P35                | Trehalose, beta,beta                     | 0.996                                |                     |                     | 1.000 | 0.823 | AV[68]     |
| P36                | Isomaltose                               | 0.999                                |                     | 0.837               | 0.990 |       | AB[69]     |
| P38                | Hydroquinone                             | 0.905                                | 0.895               | 0.983               | 0.861 |       | AV[70]     |
| P39                | Tyrosol                                  | 0.999                                |                     | 0.829               | 0.992 |       | AO[71]     |
| P40                | Homovanillyl alcohol                     |                                      |                     |                     |       |       | AI[72]     |
| P45                | 4-Coumaric acid                          |                                      | 0.838               |                     |       |       | AO, AV[73] |
| P46                | Catechollactate/Danshensu                | 0.986                                |                     |                     | 0.997 | 0.863 | ASa[74]    |
| P49                | Rosmarinic acid                          | 0.996                                |                     |                     | 1.000 | 0.823 | ASa[75]    |
| P50                | Quinic acid                              | 0.970                                |                     |                     | 0.988 | 0.899 | ASa[76]    |
| Non-polar fraction |                                          |                                      |                     |                     |       |       |            |
| NP2                | Pentadecanoic acid, 14-methyl-           |                                      |                     |                     | 0.838 | 1.000 | AB[40]     |
| NP3                | Hexadecanoic acid, 14-methyl-            | 0.858                                |                     |                     | 0.902 | 0.987 | AB[40]     |
| NP5                | Palmitic acid                            |                                      |                     |                     | 0.812 | 1.000 | AB[40]     |
| NP6                | Linoleic acid                            |                                      |                     |                     |       | 0.871 | AB[40]     |
| NP9                | Methyl stearate                          | 0.999                                |                     |                     | 0.998 |       | AB[40]     |
| NP11               | Eicosanoic acid (Arachidic acid)         |                                      |                     |                     |       | 0.945 | Kp[77]     |
| NP16               | Heptadecane                              |                                      |                     |                     |       | 0.976 | AKp[78]    |
| NP19               | Pentacosane                              | 0.990                                |                     |                     | 0.999 | 0.850 | AO, AB[79] |
| NP22               | 3-Methyltricosane                        | 0.999                                |                     |                     | 0.999 |       |            |
| NP23               | 2-Methyltetracosane                      | 0.999                                |                     | 0.836               | 0.990 |       | AO, AB[79] |
| NP24               | 3-Methylpentacosane                      | 0.998                                |                     |                     | 1.000 | 0.805 |            |
| NP27               | Oleanolic acid                           | 0.997                                |                     |                     | 1.000 | 0.814 | ASa[41]    |
| NP28               | Ursolic acid                             | 1.000                                |                     |                     | 0.998 |       | ASa[41]    |



**Table S2.** Metabolites in polar fraction from *N. nuda*. The metabolic content was compared to in vitro plants and represented as relative values. Heat map highlights the differences in the metabolic content (maximum in red and minimum in blue). Student *t*-test was applied to determine the statistical difference relative to the in vitro variant; \**P* < 0.05, n=3.

|                      | Polar metabolites                         | RT    | RI     | flower<br>vs. in vitro | leaf<br>vs. in vitro |
|----------------------|-------------------------------------------|-------|--------|------------------------|----------------------|
| Organic acids        |                                           |       |        |                        |                      |
| P1                   | Glycolic acid                             | 5.24  | 1073.1 | 0.2                    | 0.7*                 |
| P2                   | Malonic acid                              | 6.63  | 1198.2 | 0.0                    | -1.0*                |
| P3                   | Succinic acid                             | 7.73  | 1310.9 | 0.1                    | 0.4*                 |
| P4                   | Methylsuccinic acid                       | 7.83  | 1321.9 | 1.2*                   | 3.7*                 |
| P5                   | Fumaric acid                              | 8.06  | 1345.6 | -0.4                   | 1.6*                 |
| P6                   | Fumaric acid, 2-methyl- (Mesaconic acid)  | 8.52  | 1392.3 | 2.9*                   | 3.9*                 |
| P7                   | Citramalic acid                           | 9.18  | 1455.7 | 1.8*                   | 2.2*                 |
| P8                   | Malic acid                                | 9.32  | 1468.7 | 0.9*                   | -0.7*                |
| P9                   | Erythronic acid                           | 10.05 | 1538.0 | 0.6*                   | -0.3*                |
| P10                  | Tartaric acid                             | 10.96 | 1619.5 | -0.1                   | -0.9*                |
| P11                  | Citric acid                               | 13.51 | 1806.8 | -2.0*                  | -3.2*                |
| Amino acids          |                                           |       |        |                        |                      |
| P12                  | L-Alanine                                 | 5.56  | 1101.9 | -0.6*                  | -0.6*                |
| P13                  | L-Leucine                                 | 6.16  | 1156.4 | -1.0*                  | -1.7*                |
| P14                  | L-Valine                                  | 6.75  | 1211.2 | -0.2*                  | -1.3*                |
| P15                  | L-Isoleucine                              | 7.53  | 1290.5 | -0.9*                  | -2.1*                |
| P16                  | Proline                                   | 7.60  | 1298.2 | 0.7*                   | -2.5*                |
| P17                  | Glycine                                   | 7.67  | 1305.0 | -0.6                   | -2.8*                |
| P18                  | Serine                                    | 8.14  | 1353.1 | -0.2                   | -3.3*                |
| P19                  | Threonine                                 | 8.37  | 1377.2 | -0.5*                  | -2.0*                |
| P20                  | Homoserine                                | 8.96  | 1434.4 | -2.2*                  | -3.4*                |
| P21                  | L-Aspartic acid                           | 9.66  | 1500.9 | -0.5                   | -3.1*                |
| P22                  | Oxoproline                                | 9.73  | 1508.3 | -4.0*                  | -6.4*                |
| P23                  | γ-Aminobutanoic acid (GABA)               | 9.81  | 1515.6 | -1.0*                  | -3.1*                |
| P24                  | L-Glutamic acid                           | 10.80 | 1607.4 | -3.1*                  | -4.4*                |
| Alcohols             |                                           |       |        |                        |                      |
| P25                  | Glycerol                                  | 7.31  | 1267.8 | 0.3*                   | -1.0*                |
| P26                  | Galactinol                                | 31.29 | 2977.0 | -2.1*                  | -0.6*                |
| Sugar derivatives    |                                           |       |        |                        |                      |
| P27                  | Xylose                                    | 11.28 | 1643.2 | -1.9*                  | -2.4*                |
| P28                  | Fructose                                  | 14.36 | 1860.9 | 3.6*                   | 1.0*                 |
| P29                  | Glucose                                   | 14.63 | 1878.6 | 6.1*                   | 1.3*                 |
| P30                  | Mannose                                   | 14.76 | 1887.0 | 3.8*                   | 1.5*                 |
| P31                  | Galactose                                 | 15.03 | 1904.1 | 2.8*                   | 1.2*                 |
| P32                  | Myo-Inositol                              | 17.90 | 2083.3 | 0.8*                   | 0.9*                 |
| P33                  | Sucrose                                   | 26.56 | 2635.4 | 0.7*                   | 0.4*                 |
| P34                  | Trehalose, alpha,alpha'-                  | 27.89 | 2728.8 | 1.5*                   | 0.3*                 |
| P35                  | Trehalose, beta,beta                      | 28.35 | 2760.8 | 4.4*                   | -0.1                 |
| P36                  | Isomaltose                                | 29.57 | 2849.1 | 4.7*                   | 2.2*                 |
| Phenolic derivatives |                                           |       |        |                        |                      |
| P37                  | Benzoic acid                              | 7.14  | 1250.4 | -0.7*                  | 0.5*                 |
| P38                  | Hydroquinone                              | 8.57  | 1397.3 | 2.7*                   | 2.0*                 |
| P39                  | Tyrosol                                   | 10.30 | 1561.7 | 2.6*                   | 0.5                  |
| P40                  | Homovanillyl alcohol                      | 11.99 | 1695.6 | 0.8*                   | 1.0*                 |
| P41                  | Vanillic acid                             | 12.76 | 1752.5 | 0.6                    | 1.9*                 |
| P42                  | 2,5-Dihydroxybenzoic acid (Gentisic acid) | 12.89 | 1762.2 | 0.5                    | 4.0*                 |
| P43                  | Shikimic acid                             | 13.36 | 1796.9 | -0.6                   | -3.3*                |
| P44                  | Syringic acid                             | 14.76 | 1886.5 | -1.0                   | -1.4*                |
| P45                  | 4-Coumaric acid                           | 15.47 | 1932.0 | 3.3*                   | 4.5*                 |
| P46                  | Catechollactate/Danshensu                 | 17.40 | 2052.7 | 1.6*                   | -0.3                 |
| P47                  | Isoferulic acid                           | 17.93 | 2085.2 | -2.4*                  | 1.5*                 |
| P48                  | Caffeic acid                              | 18.67 | 2130.2 | 1.3*                   | 3.7*                 |
| P49                  | Rosmarinic acid                           | 37.30 | 3408.0 | 2.9*                   | 0.0                  |
| Others               |                                           |       |        |                        |                      |
| P50                  | Quinic acid                               | 14.11 | 1844.9 | 2.2*                   | -1.8*                |

**Table S3.** Metabolites in non-polar fraction from *N. nuda*. The metabolic content was compared to in vitro plants and represented as relative values. Heat map highlights the differences in the metabolic content (maximum in red and minimum in blue). Student *t*-test was applied to determine the statistical difference relative to the in vitro variant; \**P* < 0.05, n=3.

| Non-polar metabolites |                                      | RT    | RI     | flower<br>vs. in vitro | leaf<br>vs. in vitro |
|-----------------------|--------------------------------------|-------|--------|------------------------|----------------------|
| Fatty acids           |                                      |       |        |                        |                      |
| NP1                   | Pentadecanoic acid                   | 13.72 | 1820.3 | -0.6*                  | -0.9*                |
| NP2                   | Pentadecanoic acid, 14-methyl-       | 14.70 | 1882.6 | 0.4                    | -0.8                 |
| NP3                   | Hexadecanoic acid, 14-methyl-        | 16.44 | 1993.9 | 1.1*                   | -3.6*                |
| NP4                   | Heptadecanoic acid (Margaric acid)   | 16.90 | 2022.7 | -1.0*                  | -0.9*                |
| NP5                   | Palmitic acid                        | 17.20 | 2040.6 | 0.2                    | -0.3                 |
| NP6                   | Linoleic acid                        | 18.03 | 2091.6 | -0.1                   | -2.2*                |
| NP7                   | Linolenic acid                       | 18.16 | 2099.2 | -1.3*                  | -0.7*                |
| NP8                   | Oleic acid                           | 18.22 | 2103.4 | -0.4*                  | -1.5*                |
| NP9                   | Methyl stearate                      | 18.57 | 2124.3 | 0.6                    | 0.0                  |
| NP10                  | Stearic acid                         | 20.44 | 2239.5 | -0.1                   | -0.1                 |
| NP11                  | Eicosanoic acid (Arachidic acid)     | 21.82 | 2325.9 | 0.1                    | -0.4*                |
| NP12                  | Docosanoic acid (Behenic acid)       | 24.96 | 2528.2 | -0.5*                  | -0.7*                |
| NP13                  | Tetracosanoic acid (Lignoceric acid) | 27.91 | 2730.1 | 0.3*                   | 0.6*                 |
| NP14                  | Methyl 2-hydroxytetracosanoate       | 30.33 | 2905.4 | -0.3*                  | -0.5*                |
| Alkanes               |                                      |       |        |                        |                      |
| NP15                  | Hexadecane                           | 10.68 | 1597.8 | -0.3                   | -0.4*                |
| NP16                  | Heptadecane                          | 11.95 | 1692.5 | 0.0                    | -0.2                 |
| NP17                  | Octadecane                           | 13.37 | 1797.7 | -0.1                   | -0.3*                |
| NP18                  | Eicosane                             | 16.51 | 1998.4 | -0.9*                  | -1.0*                |
| NP19                  | Pentacosane                          | 24.53 | 2500.5 | 1.3*                   | -0.1                 |
| NP20                  | triacontane                          | 31.59 | 2999.1 | -0.4                   | -0.4                 |
| NP21                  | Dotriacontane                        | 34.13 | 3199.0 | -0.2                   | -0.2                 |
| Branched alkanes      |                                      |       |        |                        |                      |
| NP22                  | 3-Methyltricosane                    | 22.55 | 2371.2 | 2.5*                   | 0.3                  |
| NP23                  | 2-Methyltetracosane                  | 23.97 | 2462.8 | 2.3*                   | 0.6                  |
| NP24                  | 3-Methylpentacosane                  | 25.63 | 2572.0 | 5.0*                   | 1.0*                 |
| Sterols               |                                      |       |        |                        |                      |
| NP25                  | β-Sitosterol                         | 35.92 | 3317.5 | -0.2*                  | -0.7*                |
| NP26                  | α-Amyrin                             | 36.91 | 3382.6 | -1.2*                  | -0.9*                |
| NP27                  | Oleanolic acid                       | 40.44 | 3615.5 | 5.8*                   | 0.9                  |
| NP28                  | Ursolic acid                         | 41.16 | 3662.9 | 3.0*                   | 0.6*                 |

**Table S4.** Phytohormones in *N. nuda*. Heat map highlights the differences between the plant variants for each hormone. One-way ANOVA (Holm–Sidak) test was applied to determine the statistical difference between the variants (shown in different letters). In bold are highlighted the active forms of the hormones that trigger signal response by receptor binding.

| Hormones <sup>1</sup> | in vitro                  | flower                     | leaf                      |
|-----------------------|---------------------------|----------------------------|---------------------------|
| <b>Cytokinins</b>     |                           |                            |                           |
| Total CKs             | 1651.15 <sup>a</sup>      | 449.93 <sup>c</sup>        | 969.52 <sup>b</sup>       |
| CK bases              | <b>6.76<sup>a</sup></b>   | <b>5.79<sup>a</sup></b>    | <b>6.03<sup>a</sup></b>   |
| CK ribosides          | 100.77 <sup>a</sup>       | 25.08 <sup>b</sup>         | 3.76 <sup>c</sup>         |
| CK N-glucosides       | 961.48 <sup>a</sup>       | 365.10 <sup>b</sup>        | 823.90 <sup>a</sup>       |
| CK O-glucosides       | 193.38 <sup>a</sup>       | 18.29 <sup>c</sup>         | 80.85 <sup>b</sup>        |
| CK phosphates         | 5.22 <sup>a</sup>         | 2.06 <sup>b</sup>          | 0.56 <sup>c</sup>         |
| <b>Gibberellins</b>   |                           |                            |                           |
| GA19                  | <b>4.44<sup>a</sup></b>   | <b>0.62<sup>b</sup></b>    | <b>1.72<sup>ab</sup></b>  |
| <b>ABAs</b>           |                           |                            |                           |
| ABA                   | 34.59 <sup>b</sup>        | <b>662.25<sup>a</sup></b>  | <b>696.19<sup>a</sup></b> |
| ABA-Me                | 7.29 <sup>a</sup>         | 7.71 <sup>a</sup>          | 0.26 <sup>b</sup>         |
| ABA-GE                | 582.86 <sup>c</sup>       | 3768.31 <sup>b</sup>       | 6767.03 <sup>a</sup>      |
| ABA catabolites       | 917.54 <sup>b</sup>       | 9804.61 <sup>a</sup>       | 635.75 <sup>b</sup>       |
| <b>Jasmonates</b>     |                           |                            |                           |
| Total JAs             | 222.49 <sup>b</sup>       | 2208.81 <sup>a</sup>       | 2037.58 <sup>a</sup>      |
| JA                    | <b>180.64<sup>c</sup></b> | <b>1773.33<sup>a</sup></b> | <b>363.66<sup>b</sup></b> |
| JA-Ile                | 16.84 <sup>c</sup>        | 400.39 <sup>b</sup>        | 1650.64 <sup>a</sup>      |
| JA-Me                 | 7.64 <sup>b</sup>         | 12.04 <sup>a</sup>         | 4.58 <sup>b</sup>         |
| DiH-JA                | 17.37 <sup>b</sup>        | 23.04 <sup>a</sup>         | 18.70 <sup>b</sup>        |
| <b>Auxins</b>         |                           |                            |                           |
| IAA                   | <b>29.16<sup>c</sup></b>  | <b>305.45<sup>a</sup></b>  | <b>95.04<sup>b</sup></b>  |
| IAA+PAA               | 173.82 <sup>b</sup>       | 523.36 <sup>a</sup>        | 161.77 <sup>b</sup>       |
| IAA-Asp               | 1.25 <sup>b</sup>         | 597.69 <sup>a</sup>        | 0.67 <sup>b</sup>         |
| IAA-Glu               | 0.41 <sup>b</sup>         | 6.74 <sup>a</sup>          | 0.07 <sup>c</sup>         |
| OxIAA                 | 23.86 <sup>b</sup>        | 29.70 <sup>b</sup>         | 65.38 <sup>a</sup>        |
| IAM                   | 1.40 <sup>b</sup>         | 3.51 <sup>a</sup>          | 0.84 <sup>b</sup>         |
| I3A                   | 164.53 <sup>b</sup>       | 2244.40 <sup>a</sup>       | 62.58 <sup>b</sup>        |
| OxIAA-Glu             | 29.83 <sup>a</sup>        | 28.82 <sup>a</sup>         | 18.93 <sup>a</sup>        |
| OxIAA-Asp             | 48.91 <sup>b</sup>        | 433.36 <sup>a</sup>        | 5.00 <sup>c</sup>         |
| <b>Phenolics</b>      |                           |                            |                           |
| SA                    | <b>146.22<sup>c</sup></b> | <b>1020.39<sup>a</sup></b> | <b>596.59<sup>b</sup></b> |
| BzA                   | 168.21 <sup>c</sup>       | 425.55 <sup>a</sup>        | 245.63 <sup>b</sup>       |
| PAAM                  | 26.71 <sup>b</sup>        | 36.00 <sup>a</sup>         | 21.32 <sup>b</sup>        |
| SinAc                 | 2.03 <sup>a</sup>         | 0.58 <sup>a</sup>          | 0.11 <sup>b</sup>         |

<sup>1</sup> Metabolic forms of the hormones: **Cytokinins (CKs)**: total CKs, CK bases [CK active metabolites], CK ribosides [reversible CK modification; transportation form], CK N-glucosides [inactive CK metabolites], CK O-glucosides [CK storage metabolites], CK phosphates [CK precursors]; **Gibberellin (GA)**: GA19 [active metabolite, GA precursor]; **Abscisic acid (ABA)**: ABA [ABA active metabolite], ABA-Me [ABA methyl ester, metabolite], ABA-GE [ABA glucose ester, metabolite], ABA catabolites [include dihydrophaseic acid/DPA, phaseic acid/PA, 7OH-ABA, 9OH-ABA]; **Jasmonic acid (JA)**: total, JA [active metabolite], JA-Ile [JA-isoleucine, active metabolite], JA-Me [JA methyl ester, metabolite], DiH-JA [dihydro-JA, metabolite]; **Auxins**: IAA [indole-3-acetic acid, active metabolite that is transported], IAA+PAA [IAA, and phenylacetic acid with auxin-like activity, but not transported], IAA-Asp [IAA-aspartate, inactive conjugate], IAA-Glu [IAA-glutamate, metabolite], OxIAA [oxo-IAA, catabolite], IAM [indole-3-acetamide, IAA precursor], I3A [indole-3-aldehyde, IAA metabolite], OxIAA-Glu [oxo-IAA-glucose ester, catabolite], OxIAA-Asp [oxo-IAA-aspartate, catabolite]; **Phenolics**: SA [salicylic acid, active metabolite], BzA [benzoic acid, SA precursor], PAAM [phenylacetamide, phenolic amide], SinAc [sinapic acid, phenolic acid].
